# Supplementary material for: Past and projected temporal trends in arthroscopic hip surgery in England between 2002 and 2013
Source: PubMed Central journal article supplement — BMJ Open Sport Exerc Med. 2016 Mar 21;2(1):e000082. doi: 10.1136/bmjsem-2015-000082 (PMC5117047; doi:10.1136/bmjsem-2015-000082), 2016-03-21
Supplement: bmjsem-2015-000082supp.pdf [file bmjsem-2015-000082supp.pdf]

### Hip Arthroscopy Codes:

The following codes were identified for hip arthroscopy (when coded with Z90.2 or Z84.3).

### OPCS Codes for Arthroscopic Joint Preserving Hip Surgery:

| OPCS-4 Code | Description                                                        |
|-------------|--------------------------------------------------------------------|
| W831        | Endoscopic Drilling of lesion of Articular Cartilage               |
| W832        | Endoscopic Fixation of Lesion of Articular Cartilage               |
| W833        | Endoscopic Shaving of Articular Cartilage                          |
| W834        | Endoscopic Articular Abrasion Chondroplasty                        |
| W835        | Endoscopic Articular Thermal Chondroplasty                         |
| W836        | Endoscopic Excision of Articular Cartilage                         |
| W837        | Endoscopic Osteochondral Autograft                                 |
| W838        | Other Endoscopic Therapeutic Procedure                             |
| W839        | Unspecified Endoscopic Therapeutic Procedure                       |
| W841        | Endoscopic Repair of Intra-articular Ligament                      |
| W842        | Endoscopic Reattachment of Intra-Articular Ligament                |
| W843        | Endoscopic Division of Synovial Plica                              |
| W844        | Endoscopic Decompression of Joint                                  |
| W845        | Endoscopic Drilling of Epiphysis for Repair of Articular Cartilage |
| W846        | Endoscopic Excision of Synovial Plica                              |
| W847        | Endoscopic Repair of Superior Labrum Anterior to Posterior Tear    |
| W848        | Other Endoscopic Therapeutic Procedure                             |
| W849        | Unspecified Endoscopic Therapeutic Procedure                       |

|      |                                                                 |
|------|-----------------------------------------------------------------|
| W861 | Endoscopic Removal of Loose Body from Joint                     |
| W868 | Other Endoscopic Therapeutic Procedure                          |
| W869 | Unspecified Endoscopic Therapeutic Procedure                    |
| W881 | Diagnostic Endoscopic Examination of Joint and Biopsy of Lesion |
| W888 | Other Specified Diagnostic Examination of Joint                 |
| W889 | Unspecified Endoscopic Diagnostic Examination of Joint          |
| W891 | Endoscopic Chondroplasty                                        |
| W898 | Other Endoscopic Therapeutic Procedure                          |
| W899 | Unspecified Endoscopic Therapeutic Procedure                    |
| W831 | Endoscopic Drilling of lesion of Articular Cartilage            |
